# Supplementary material
Source: publisher site journal article supplement (https://www.degruyterbrill.com/publication/isbn/9783110368635/downloadAsset/9783110368635_Inhalt.pdf)
Supplement: Supplementary file 1 [file 9783110368635_Inhalt.pdf]

# Inhalt

|               |     |
|---------------|-----|
| Vorwort ..... | VII |
|---------------|-----|

## NATURWISSENSCHAFT, PHYSIOLOGIE UND PHILOSOPHIE

Steffen Dietzsch

|                                                                                                                     |   |
|---------------------------------------------------------------------------------------------------------------------|---|
| Wie Farben ›hinter dem Spektrum‹ Gestalt annehmen:<br>Von der Konstruktivität der romantischen Naturforschung ..... | 3 |
|---------------------------------------------------------------------------------------------------------------------|---|

Claudia Nitschke

|                                                                                                                                            |    |
|--------------------------------------------------------------------------------------------------------------------------------------------|----|
| Sprache und Erkenntnis: Licht und Dunkel<br>in Clemens Brentanos und Johann Joseph von Görres<br>›Geschichte von BOGS dem Uhrmacher‹ ..... | 15 |
|--------------------------------------------------------------------------------------------------------------------------------------------|----|

Yvonne Pietsch

|                                                                                                                                   |    |
|-----------------------------------------------------------------------------------------------------------------------------------|----|
| Schattenspielereien: Ästhetische und physikalische Experimente<br>mit Licht und Schatten in Arnims Schattenspiel »Das Loch« ..... | 31 |
|-----------------------------------------------------------------------------------------------------------------------------------|----|

## MALEREI, WAHRNEHMUNG UND ÄSTHETIK

Oliver Jehle

|                                                                                 |    |
|---------------------------------------------------------------------------------|----|
| ›A kind of magick‹: Gainsborough, Priestley und<br>die Dynamik der Farben ..... | 41 |
|---------------------------------------------------------------------------------|----|

Saskia Pütz

|                                                                                                                           |    |
|---------------------------------------------------------------------------------------------------------------------------|----|
| ›Aufhebung aller Individualität‹ – Die Farbe Grau<br>bei Philipp Otto Runge im Kontext seiner religiösen Anschauung ..... | 57 |
|---------------------------------------------------------------------------------------------------------------------------|----|

Bernd Hamacher

|                                                                                                                                                  |    |
|--------------------------------------------------------------------------------------------------------------------------------------------------|----|
| Grau und Braun – »Vorgefühl der Gegensätze des Kalten und Warmen«:<br>Zur Rehabilitierung der ›farblosen‹, ›schmutzigen‹ Farben bei Goethe ..... | 73 |
|--------------------------------------------------------------------------------------------------------------------------------------------------|----|

Walter Pape

|                                                                                                                                  |    |
|----------------------------------------------------------------------------------------------------------------------------------|----|
| ›Richtige Zeichnung und Charakter‹ und »reichergiebiger Farbenquast«:<br>Umriss und Farbe in Literatur und Malerei um 1800 ..... | 81 |
|----------------------------------------------------------------------------------------------------------------------------------|----|

Norman Kasper

- »in seiner ursprünglichen bunten Wunderbarkeit«: Aufgeklärte  
Wahrnehmungstheorie und romantisierte Wahrnehmung  
bei Novalis und Tieck ..... 101

Urs Büttner

- Klangfarbe – Zur Genese einer musikästhetischen Metapher  
in der romantischen Literatur ..... 117

## SYMBOLIK UND HEILSGESCHICHTE

Irmgard Egger

- Blau und Gold: Chromatik der Sehnsucht bei Novalis ..... 127

Lothar Ehrlich

- »mit Farben bunt geschmückt« und »Ew'ger Liebe hohes Licht«  
Farbsymbolik in Arnims Drama »Halle und Jerusalem« ..... 137

Roswitha Burwick

- »Es kommen jetzt so schöne fremde Farben auf«: Arnims Spiel  
mit Licht und Farbe in »Die drei liebevollen Schwestern  
und der glückliche Färber« ..... 145

## FARBWÖRTER UND FARBREALITÄT

Stefan Nienhaus

- Glänzender, schimmernder Schein: Zur Rolle der  
Farbbezeichnungen in Tiecks synästhetischen Phantasien ..... 163

Renate Moering

- Farben in der Lyrik Achim von Arnims ..... 173

Gert Theile

- Grauzone des Realen: Annäherung an eine romantische Farbnuance .... 189

Literaturverzeichnis ..... 199

Verzeichnis der Beiträgerinnen und Beiträger ..... 217
